# Supplementary material
Source: HighWire-hosted journal article supplement (https://www.cancerbiomed.org/content/19/9/1315)
Supplement: media-1 [file media-1.pdf]

# Supplementary materials

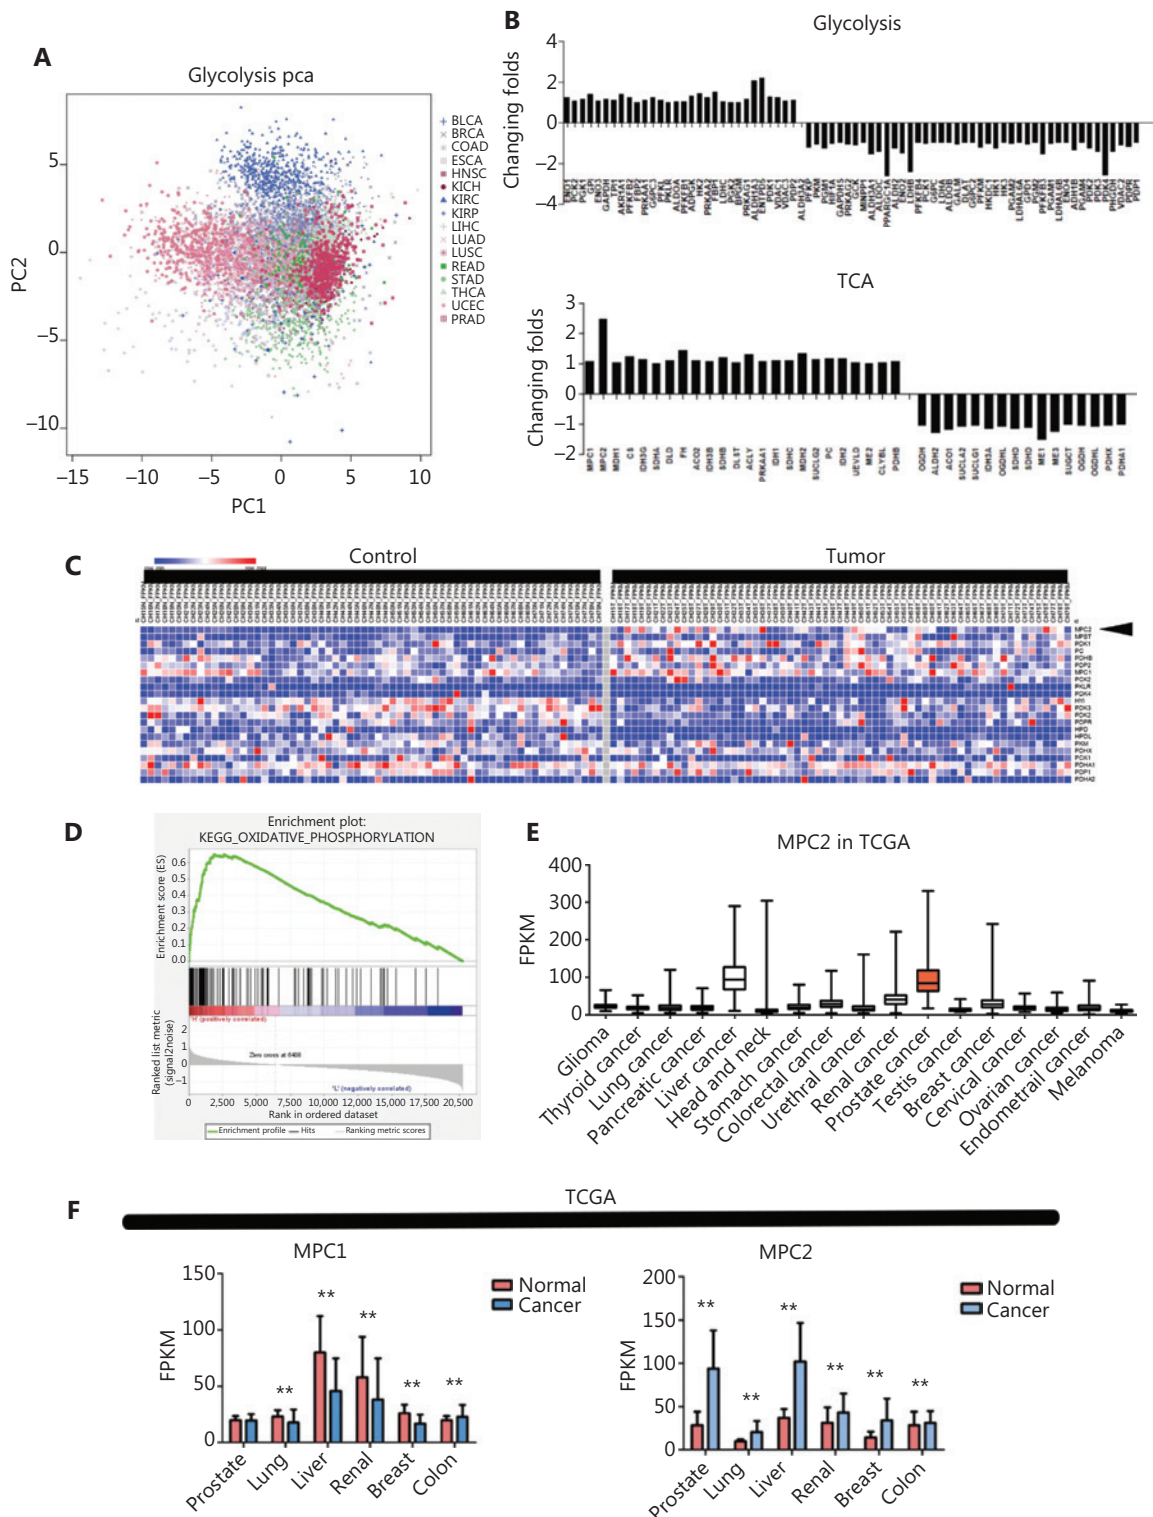

**Figure S1** Related to **Figure 1**. Metabolic changes in prostate cancer and MPC expression. (A) Changes in glycolysis and MPC expression. (B) Changes in glycolysis and TCA cycle associated mRNA in prostate cancer (relative to **Figure 1A**). (C) Different expression of glycolysis and TCA cycle associated mRNA levels. The fold change

is shown by the ratio of PCa to benign tissue. (C) RNA-Seq data for pyruvate metabolism associated genes in prostate cancer (the black arrow indicates MPC2) and MPC2 expression in different tissues. (D) GSEA of MPC2 mRNA levels and OXPHOS. (E) MPC2 levels in different types of cancers, according to TCGA data. (F) MPC1 and 2 levels in tumor and non-tumor tissues from different types of cancers, according TCGA data. The data are represented as mean  $\pm$  SEM.  $**P < 0.01$ , compared with the control group. The data from A-D are from group A.

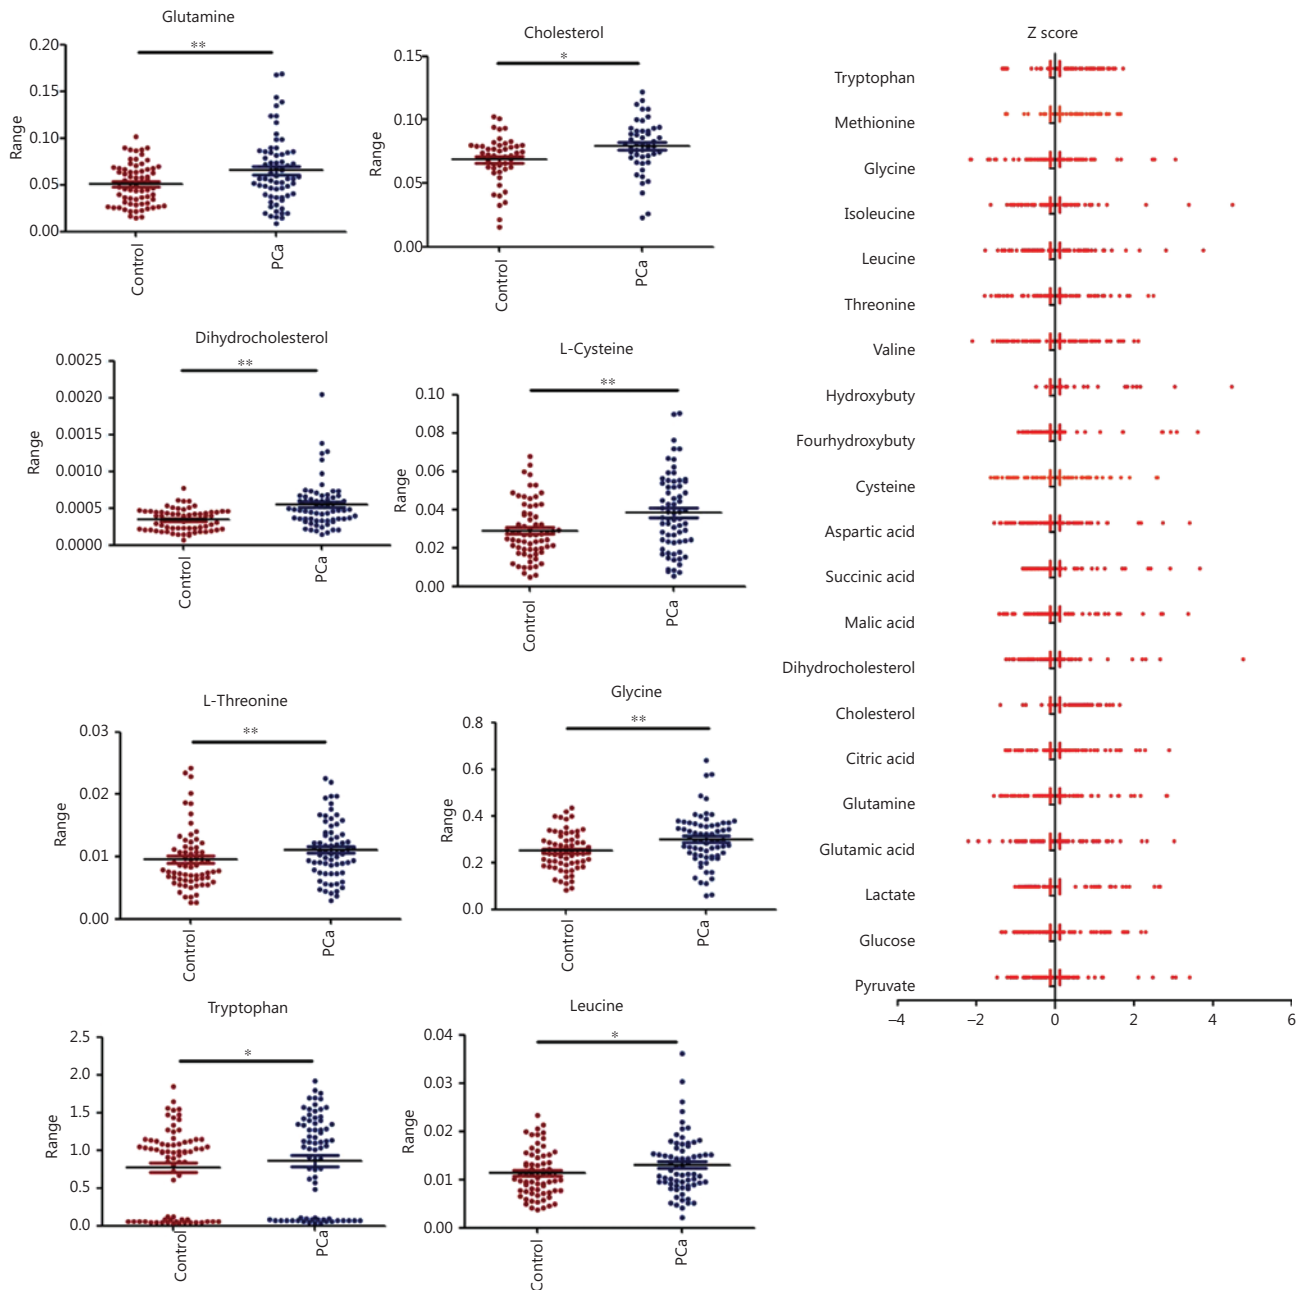

**Figure S2** Related to **Figure 1**. Glucose associated metabolic profiling data of prostate cancer and benign prostate tissue. The data are represented as mean  $\pm$  SEM.  $*P < 0.05$ ;  $**P < 0.01$ , compared with the control group.

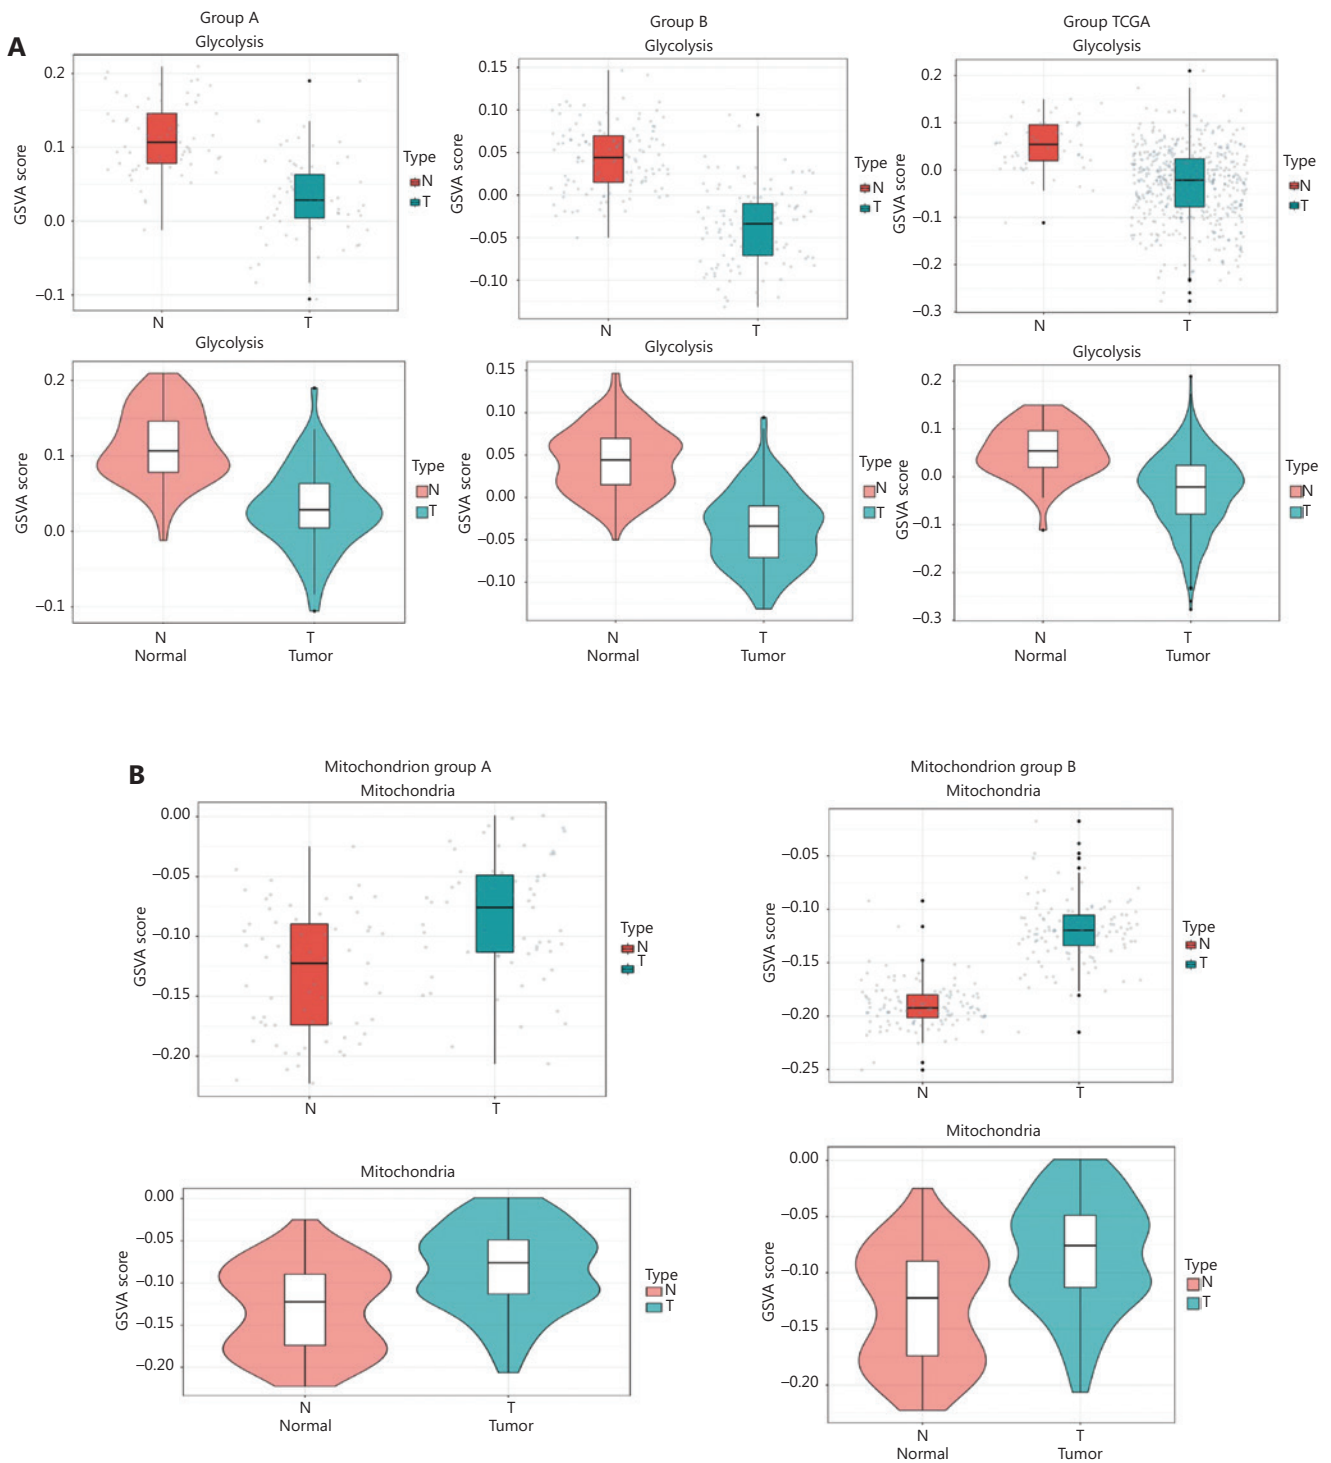

**Figure S3** Related to **Figure 1**. (A) Different expression of glycolysis associated mRNA in different groups of patients. (B) Different expression of mitochondrially associated mRNA in different groups of patients.

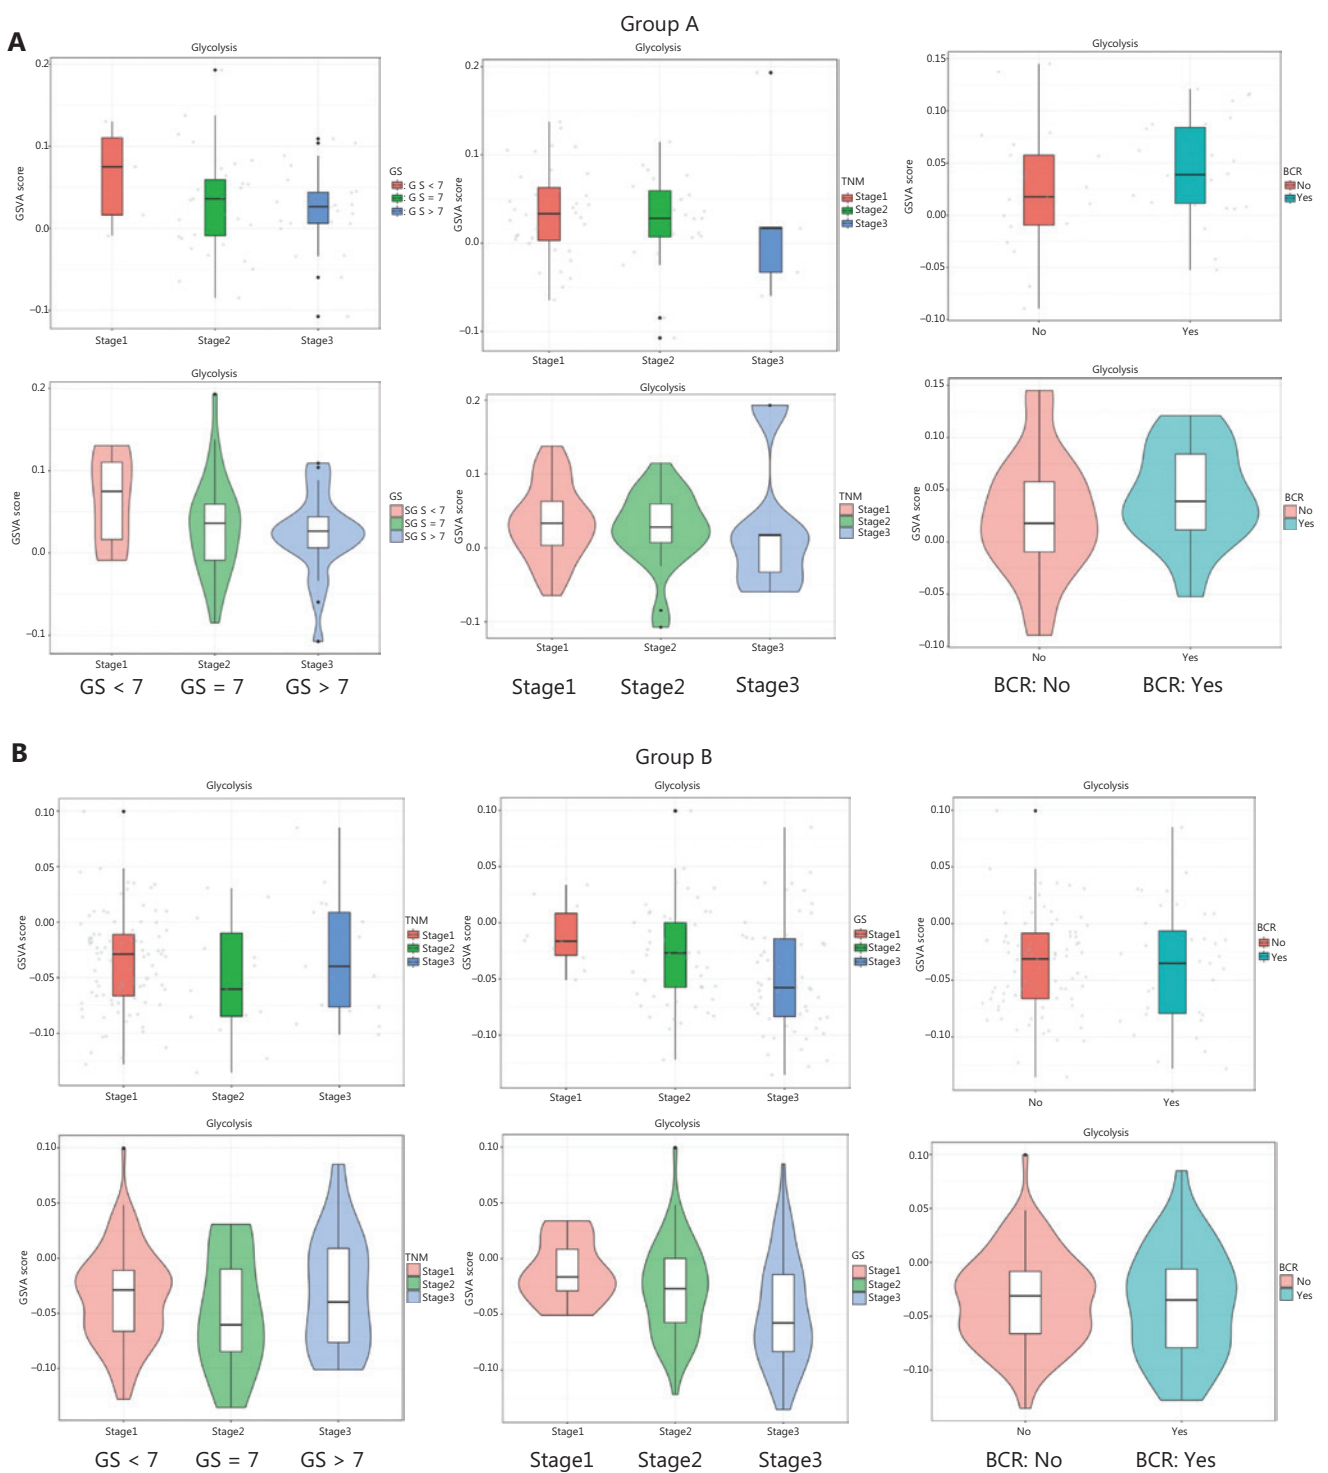

**Figure S4** Related to **Figure 1**. Different expression of glycolysis associated mRNA in different groups of patients according to the clinical prognosis, including TNM stages, Gleason score (GS), and BCR. In the GS, TNM stage 1 = T1-2N0M0, stage 2 = T3-4N0M0, stage 3 = TxN1M0.

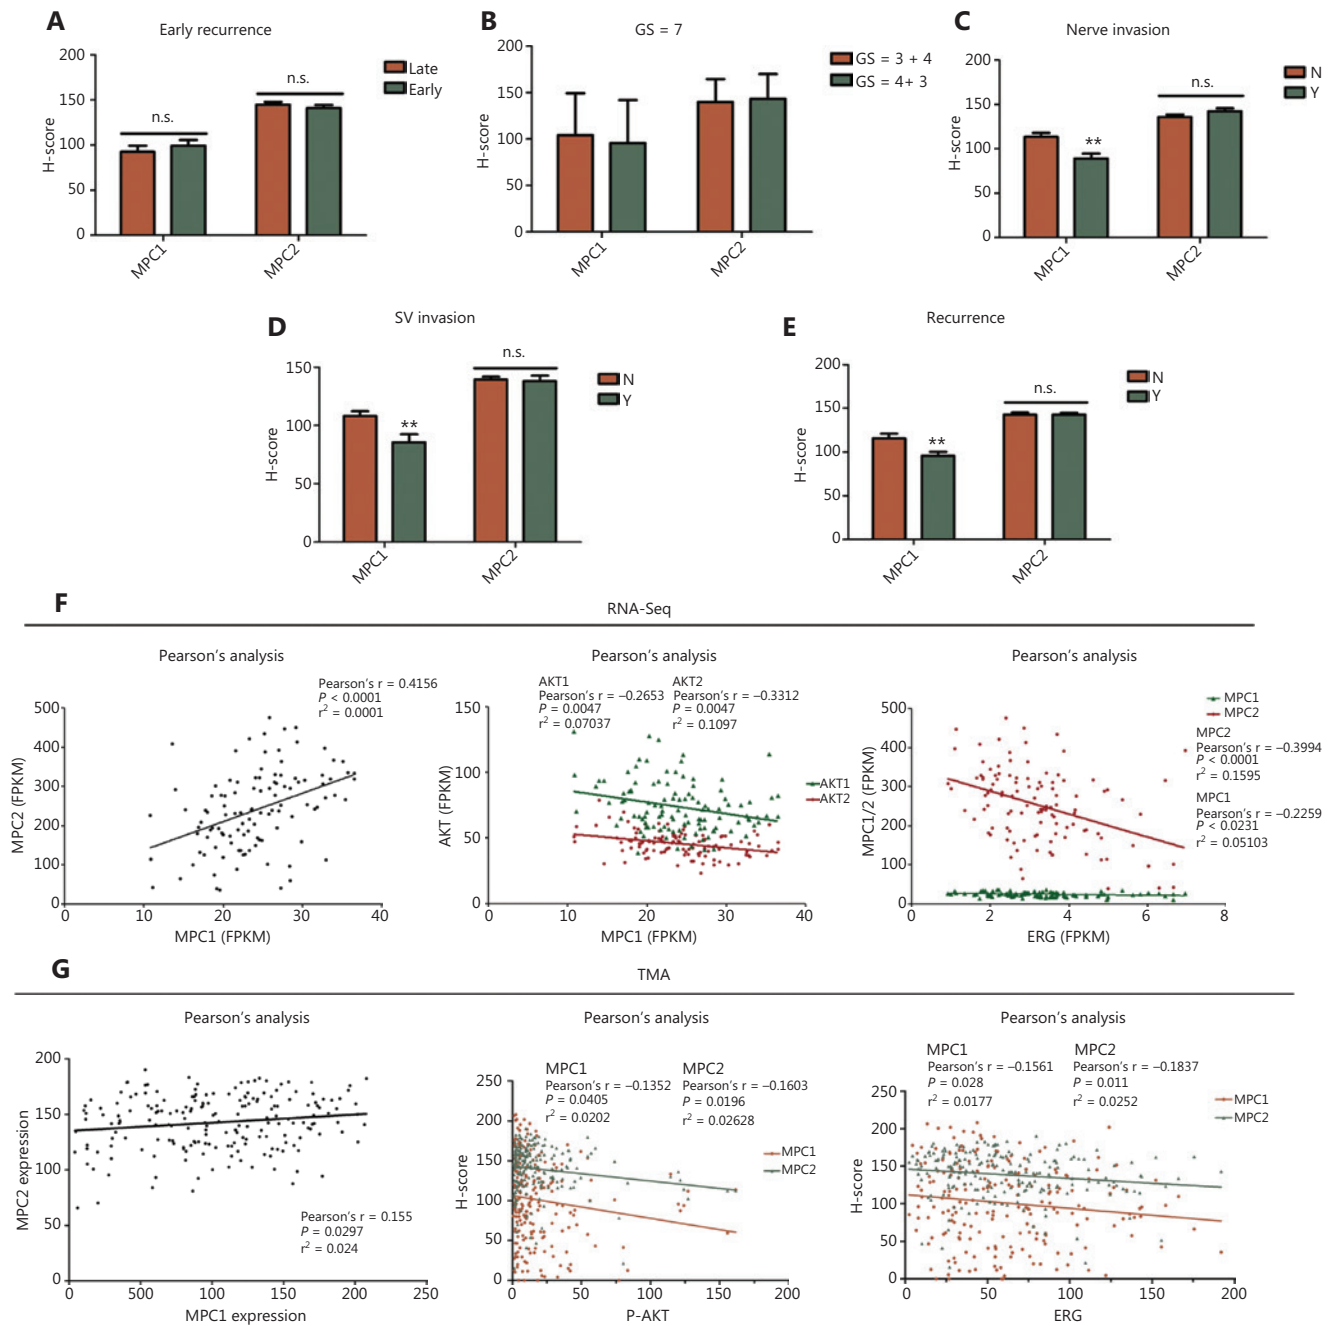

**Figure S5** Related to **Figure 1**. (A–E) Different expression of MPC according to different clinical characteristics in group A patients. (F, G) Co-expression between MPC1/2 and the oncogenes AKT and ERG in PCa. The data are from the RNA-Seq data (group B,  $n = 125$ ) or TMA data ( $n = 210$ ) as indicated. The data are represented as the mean  $\pm$  SEM. \*\* $P < 0.01$ .

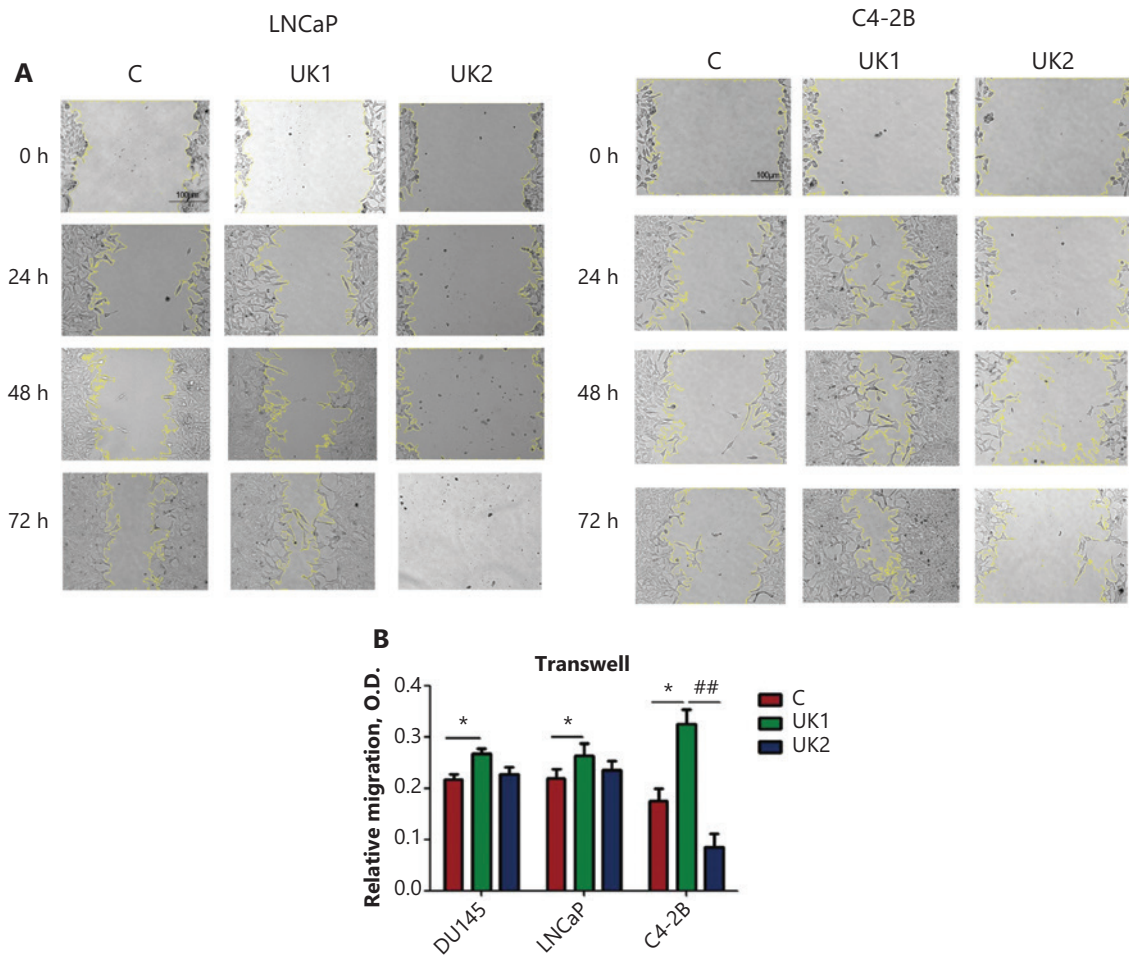

**Figure S6** Related to **Figure 2**. Different effects of transient blockade of mitochondrial pyruvate influx in benign prostate cells and prostate cancer cells. (A) Wound healing analysis of LNCaP and C4-2B cell lines with C, UK1, and UK2 treatment. (B) Transwell study of DU145, LNCaP, and C4-2B cell lines with C, UK1, and UK2 treatment. \* $P < 0.05$ , ## $P < 0.01$ .



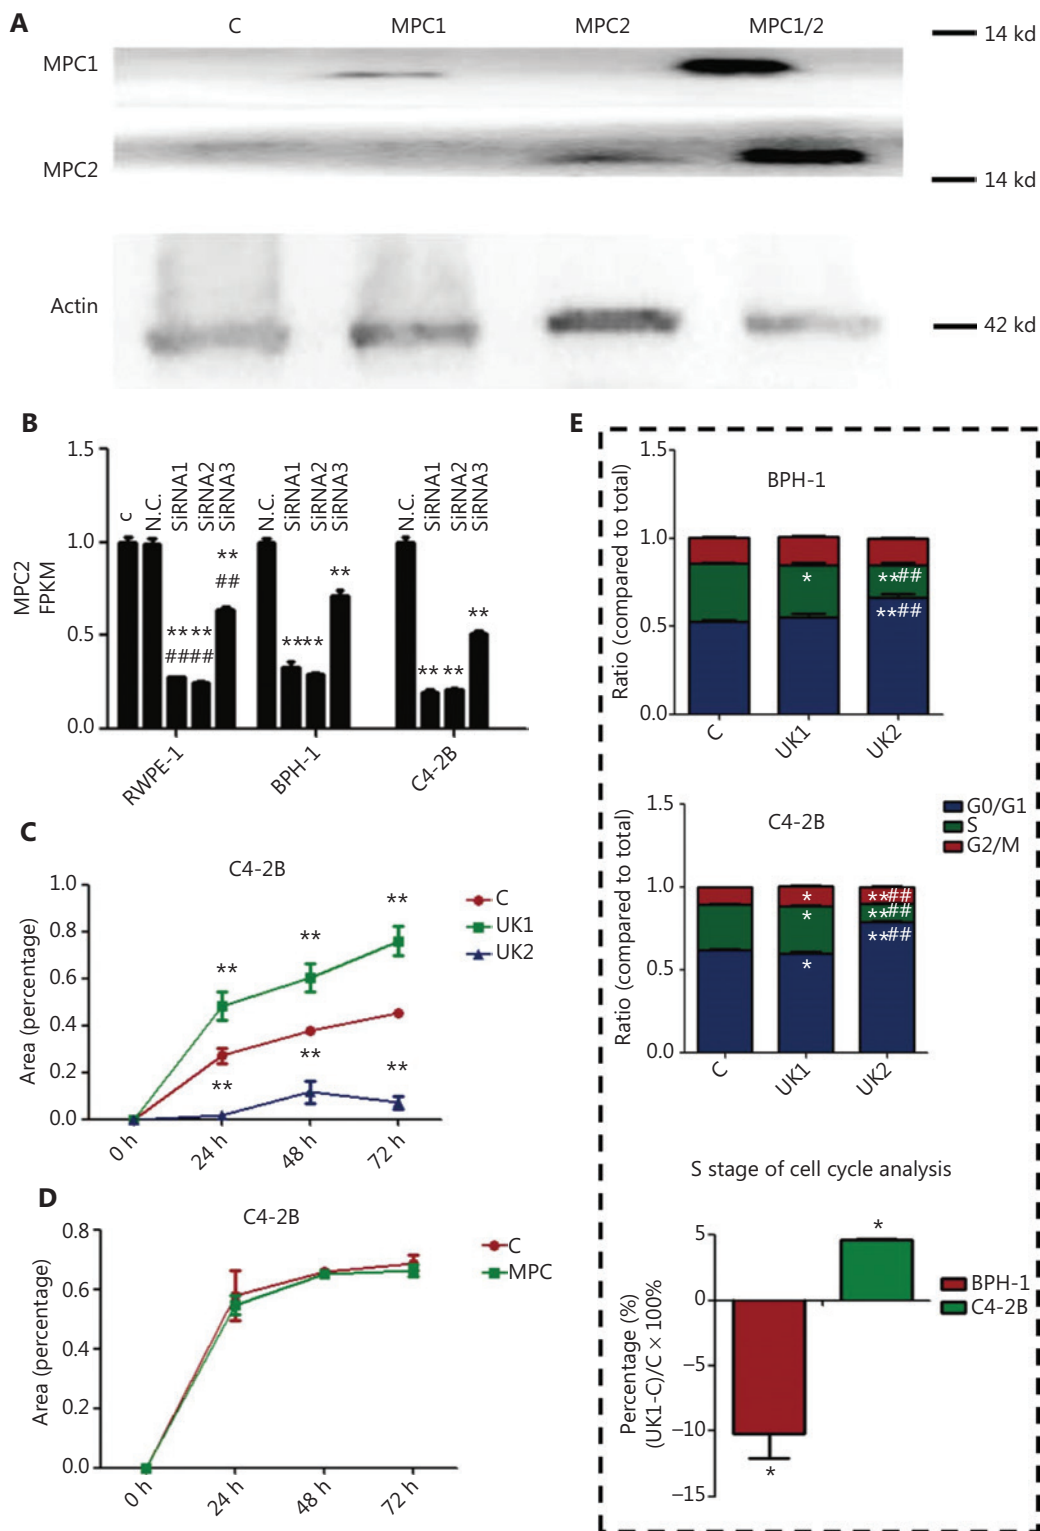

**Figure S7** Related to **Figure 2**. (A, B) MPC expression after siRNA treatment. (C) Growth curve of UK5099 treated C4-2B cells. (D) Growth curve of MPC overexpressing C4-2B cells. MPC: MPC overexpression. (E) Cell cycle analysis of different cell lines after treatment with UK5099. The data are represented as mean  $\pm$  SEM. \* $P < 0.05$ , \*\* $P < 0.01$ , compared with the control group, ### $P < 0.01$ , compared with the UK1 group, UK1: 10  $\mu$ m UK5099, UK2: 100  $\mu$ m UK5099, EV: empty vector, MPC: MPC1/2 overexpression. All experiments were performed in more than 3 replicates. The bars are 10  $\mu$ m.

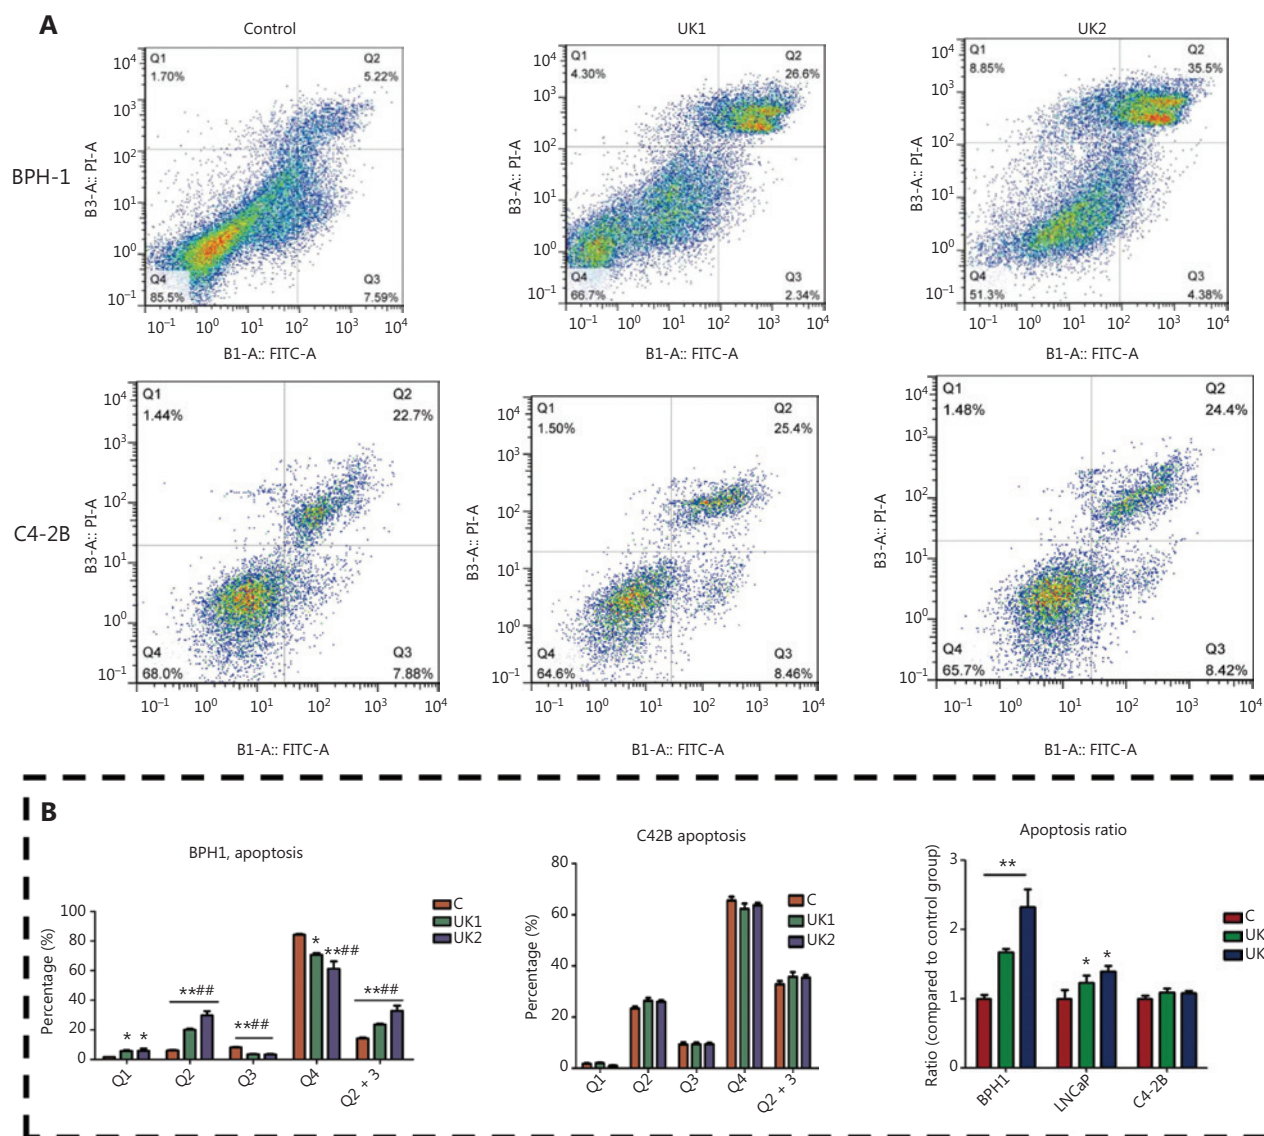

**Figure S8** Related to **Figure 2**. Apoptosis, measured by flow cytometry analysis of control, UK1, and UK2 treated cell lines. \* $P < 0.05$ , \*\* $P < 0.01$ , compared with the control group, ## $P < 0.01$ , compared with the UK1 group, UK1: 10  $\mu\text{m}$  UK5099, UK2: 100  $\mu\text{m}$  UK5099, EV: empty vector, MPC: MPC1/2 overexpression. All experiments were performed in more than 3 replicates. The bars are 10  $\mu\text{m}$ .



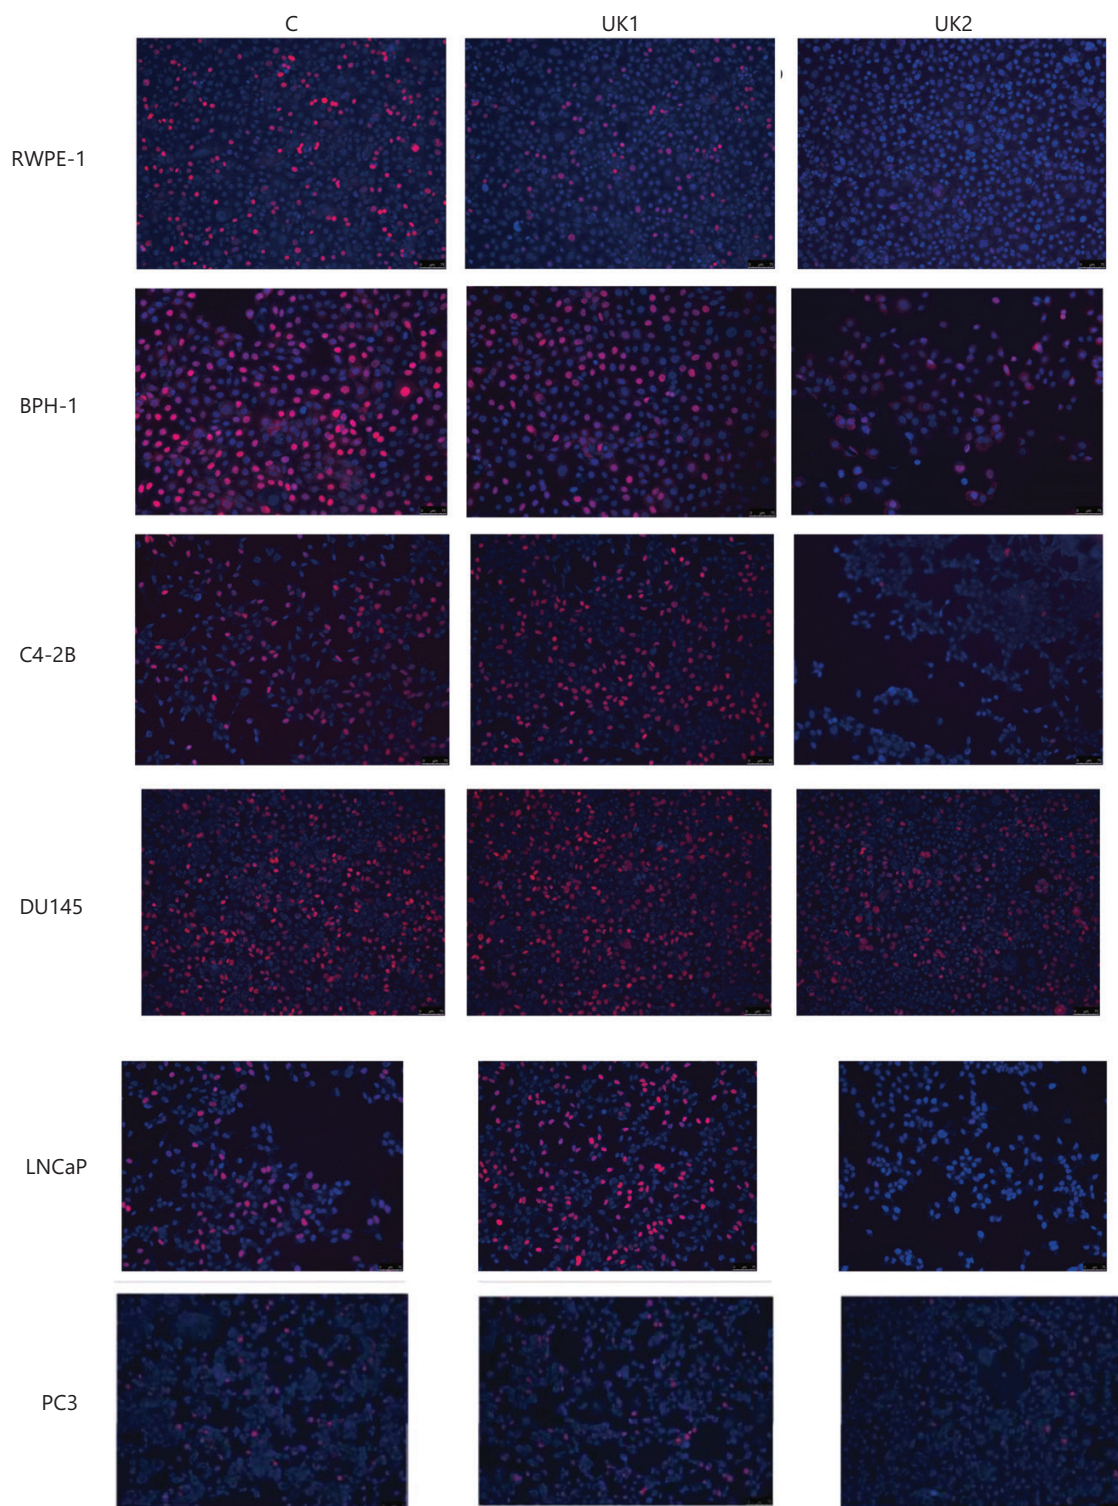

**Figure S9** Related to **Figure 2**. EdU measurement in control, UK1, and UK2 treated cell lines.



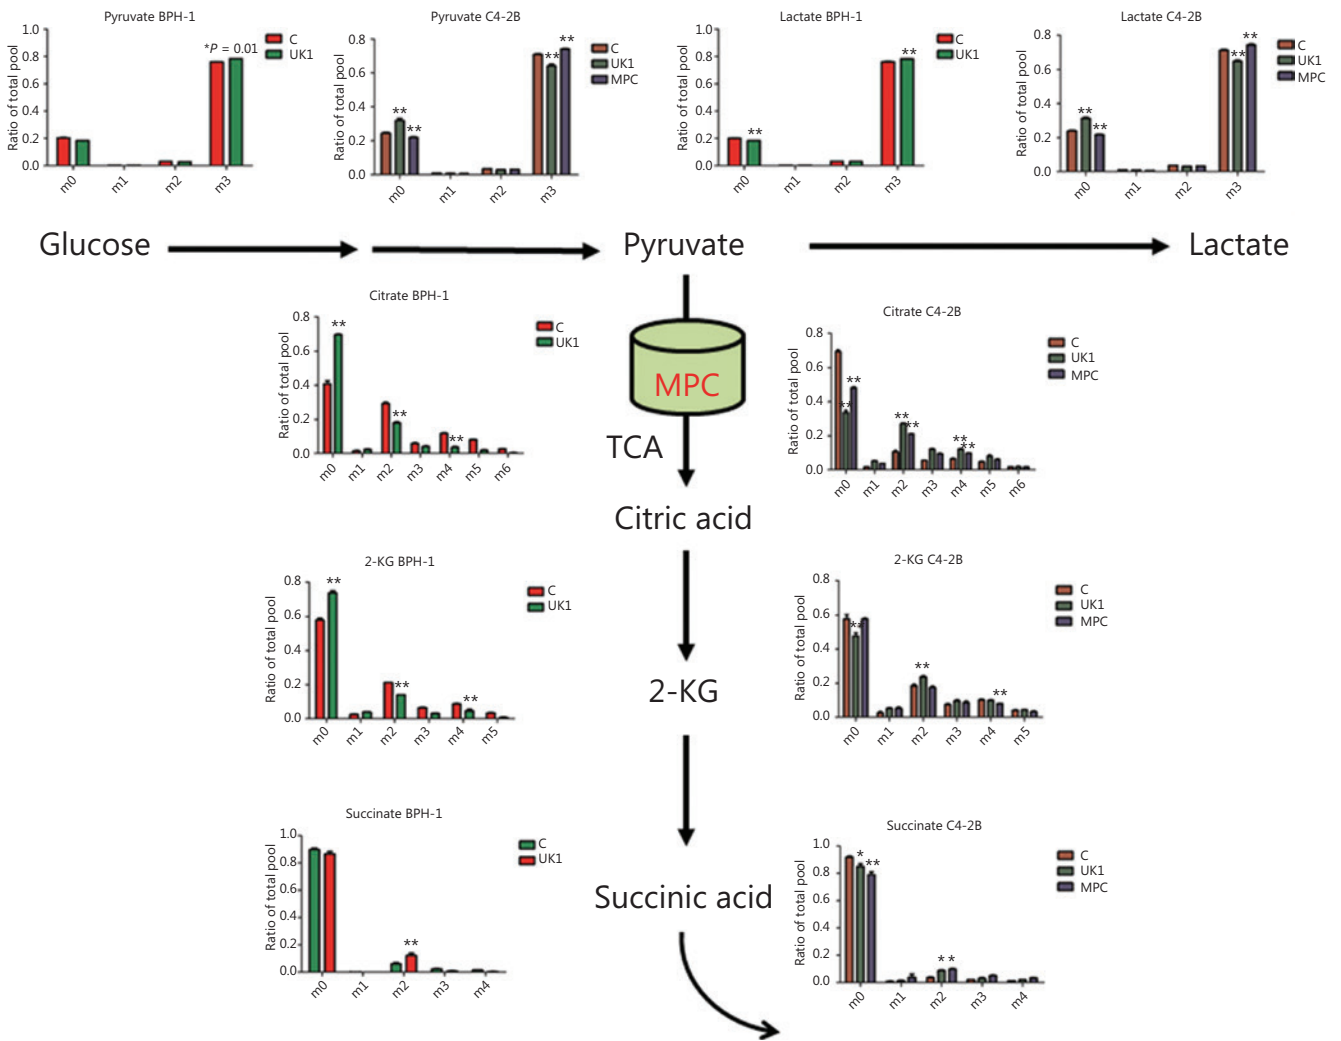

**Figure S11** Related to **Figure 3**. D-[U-<sup>13</sup>C] glucose tracer for the metabolic process in BPH-1 and C4-2B cell lines. \*P < 0.05, \*\*P < 0.01, compared with the control group, UK1: 10 μM UK5099, UK2: 100 μM UK5099, EV: empty vector, MPC: MPC1/2 overexpression.

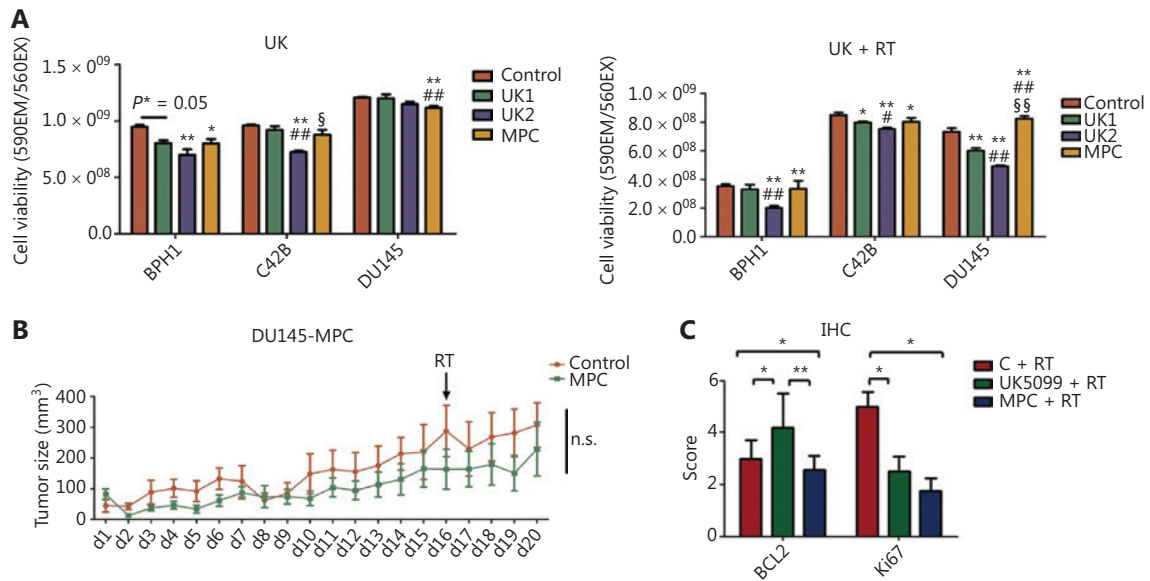

**Figure S12** Related to **Figure 4**. *In vivo* study and the application of MPC transient block. (A) UK5099 increases the radiosensitivity of the PCa cells. When treated with UK5099, C4-2B and DU145 present more sensitivity to RT than the BPH-1 cells. (B) The growth curve of a DU145-MPC overexpressing subcutaneous tumor. (C) Analysis of IHC staining of BCL2 and Ki67. The data are represented as mean  $\pm$  SEM.  $*P < 0.05$ ,  $**P < 0.01$ , compared with the control group, UK5099: mice treated with UK5099 (6 mg/kg BW), MPC: MPC1/2 overexpression. All experiments were performed in more than 3 replicates.  $\#P < 0.05$ ,  $\#\#P < 0.01$ , compared with the UK1 group;  $\$P < 0.05$ ,  $\$\$P < 0.01$ .



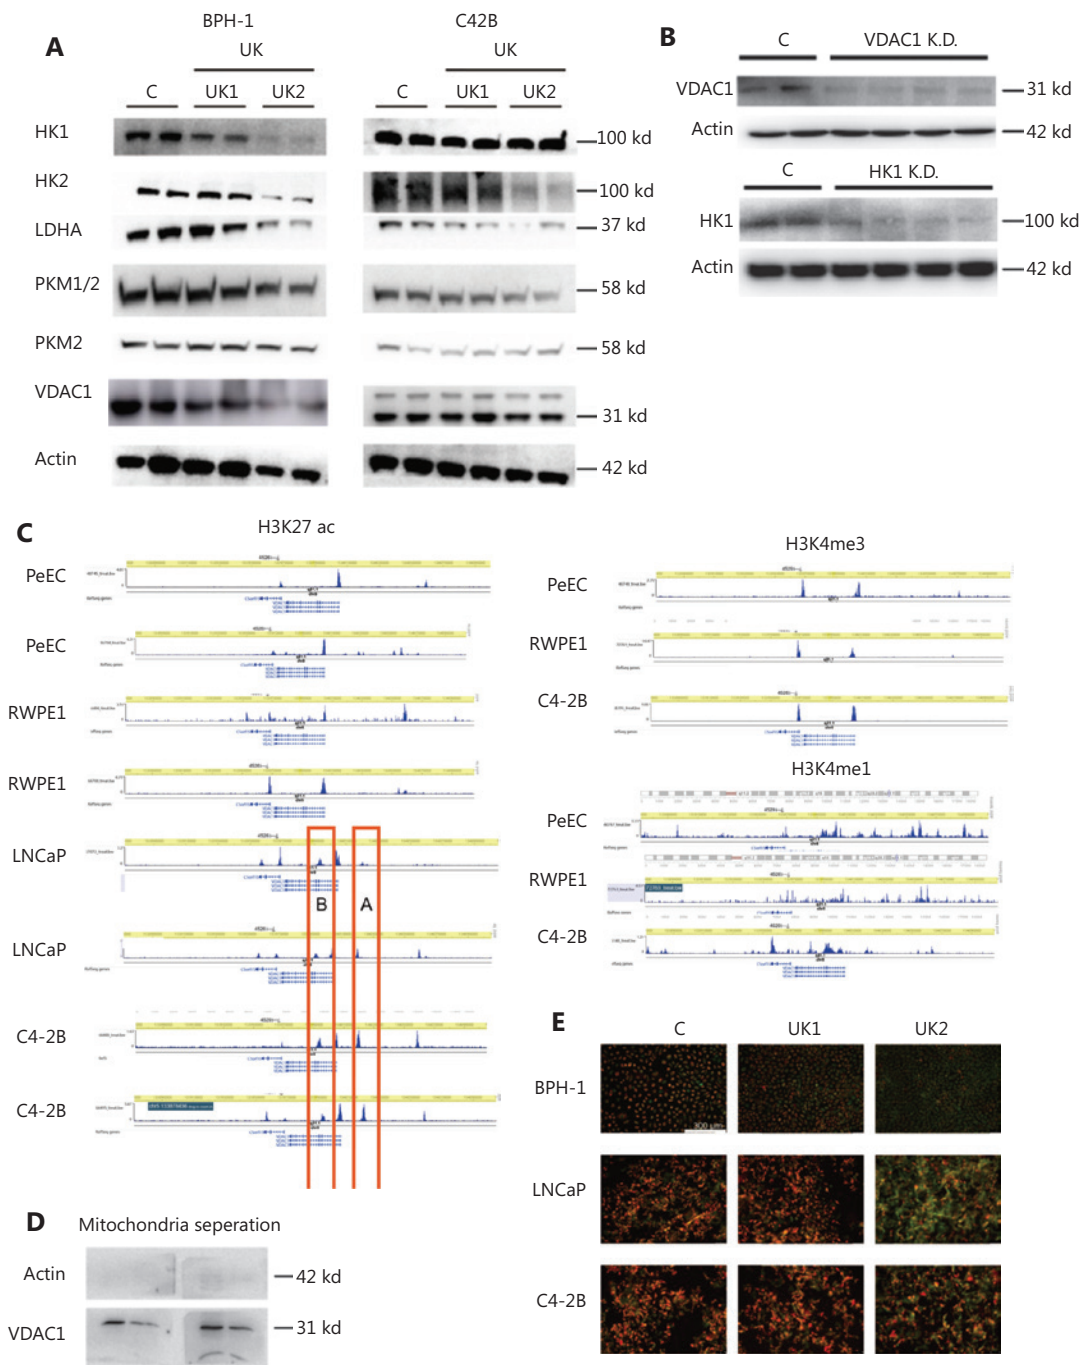

**Figure S13** Related to **Figure 5**. Effects of mitochondrial pyruvate influx on mitochondrial homeostasis. (A) Western blot analysis of the screened glycolysis associated key enzymes. (B) Western blot analysis of VDAC1 and HK1 changes after VDAC1 or HK1 downregulation. (C) Epigenetic analysis results from the public database Washu Epigenome Browser. Two high peaks were observed in LNCaP and C4-2B but not in normal prostate cell lines. We designed 2 primers for each zone (A-1, A-2, B-3, and B-4). (D) Western blot analysis of the efficiency of mitochondrial separation. (E) JC-1 fluorescence in BPH-1, C4-2B, and LNCaP cell lines after UK5099 treatment. The data are represented as mean  $\pm$  SEM. UK1: 10  $\mu$ m UK5099, UK2: 100  $\mu$ m UK5099, MPC: MPC1/2 overexpression. All experiments were performed in more than 3 replicates. The bars are 10  $\mu$ m.

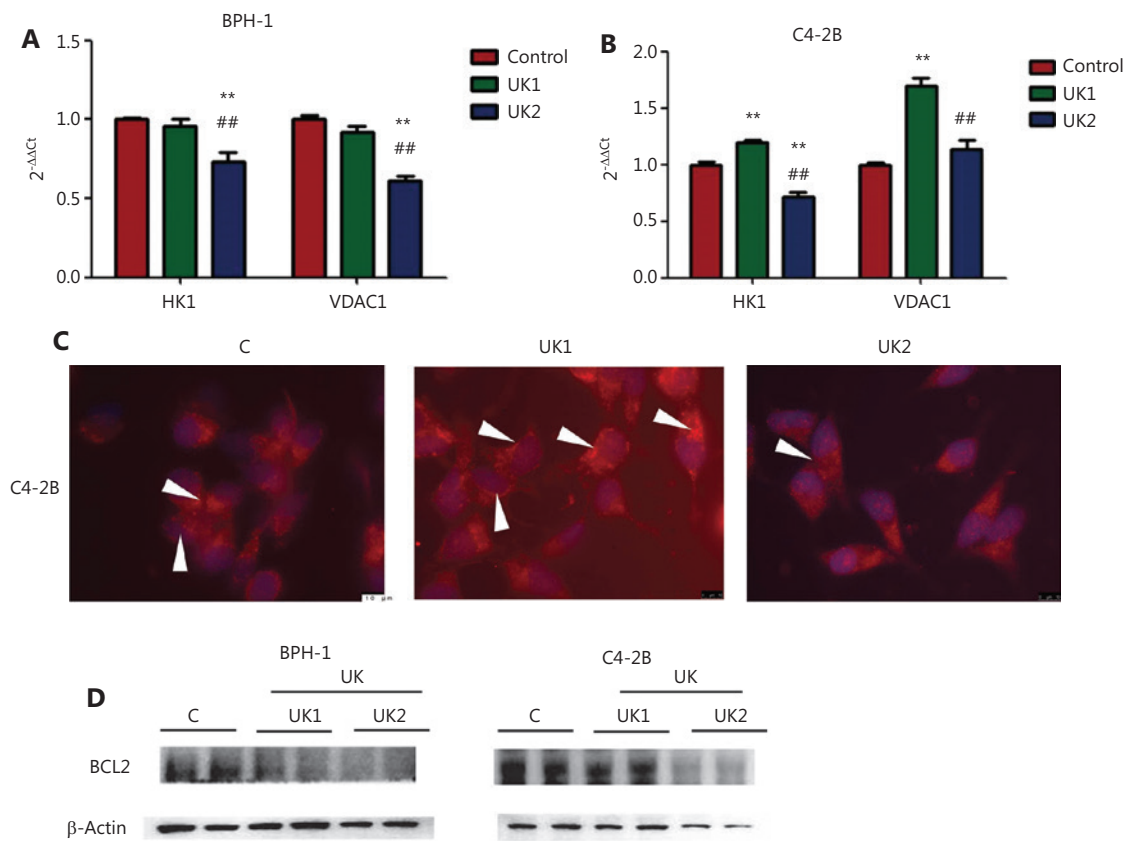

**Figure S14** Related to **Figure 5**. (A, B) HK1 and VDAC1 mRNA levels in different cell lines after UK5099 treatment. (C) Cytochrome c (white arrows) changes in C4-2B cell lines observed with immunofluorescence. (D) BCL2 changes in BPH-1 cells and C4-2B cells after low-dose UK5099 treatment. The data are represented as mean  $\pm$  SEM.  $**P < 0.01$ , compared with the control group,  $##P < 0.01$ , compared with the UK1 group, UK1: 10  $\mu$ m UK5099, UK2: 100  $\mu$ m UK5099, MPC: MPC1/2 overexpression. All experiments were performed in more than 3 replicates. The bars are 10  $\mu$ m.



**Table S1** Glycolysis associated genes

---

ALDH3B1  
 PFKP  
 PKM  
 ALDH3A2  
 ENO1  
 PGM1  
 DLD  
 PCK2  
 PGK1  
 GPI  
 GAPDHS  
 GCK  
 MINPP1  
 ENO3  
 ALDH3A1  
 ALDOC  
 ALDH2  
 GAPDH  
 TPI1  
 ENO2  
 LDHB  
 AKR1A1  
 PCK1  
 FBP2  
 ACSS2  
 G6PC  
 PDHA1  
 ALDH3B2  
 LDHA  
 ALDOB  
 ALDH1B1  
 G6PC3  
 PFKL  
 ALDH9A1  
 PKLR  
 GALM

---

**Table S1** Continued

---

ALDOA  
 DLAT  
 G6PC2  
 PFKM  
 ACSS1  
 HKDC1  
 HK1  
 ADPGK  
 HK2  
 HK3  
 PDHA2  
 PGAM2  
 ALDH7A1  
 FBP1  
 LDHC  
 LDHAL6A  
 PDHB  
 PGM2  
 PGK2  
 PGAM1  
 LDHAL6B  
 BPGM  
 ADH6  
 ALDH1A3  
 ADH1A  
 ADH7  
 ADH1B  
 ADH5  
 ADH4  
 PGAM4

---

**Table S2** Primers

| Primers               |                          |
|-----------------------|--------------------------|
| HK1                   |                          |
| Forward primer        | GCTCTCCGATGAAACTCTCATAG  |
| Reverse primer        | GGACCTTACGAATGTTGGCAA    |
| VDAC1                 |                          |
| Forward primer        | ACGTATGCCGATCTTGGCAAA    |
| Reverse primer        | TCAGGCCGTACTIONCAGTCCATC |
| MPC1 Fwd1             | (GTGCGGAAAGCGGCGGACTA)   |
| MPC1 Rev1             | (GGCAGCAATGGGAAGACCCCA)  |
| MPC2 Fwd              | (TACCACCGGCTCCTCGATAAA)  |
| MPC2 Rev              | (TATCAGCCAATCCAGCACACA)  |
| OPA1-1 forward primer | TGTGAGGTCTGCCAGTCTTTA    |
| OPA1-1 reverse primer | TGTCCTAATTGGGGTCGTTG     |
| AR binding sequence:  |                          |
| MPC1                  |                          |
| Primer pair 1-1       |                          |
| Forward primer        | GTCCTATGCACAATGAGTAGC    |
| Reverse primer        | ATGGTGCATCCGTTTAGTGGA    |
| Primer pair 1-2       |                          |
| Forward primer        | GTCCTATGCACAATGAGTAGCA   |
| Reverse primer        | TGGTGCATCCGTTTAGTGATT    |
| Primer pair 2-1       |                          |
| Forward primer        | GAGGGTCGCGTGCTAATGAT     |
| Reverse primer        | AGCGTGACTGCTTACGTGTT     |
| Primer pair 2-2       |                          |
| Forward primer        | ATACTCCTAGGCGAGGGTCCG    |
| Reverse primer        | AAGCGTGACTGCTTACGTGT     |

**Table S2** Continued

| Primers         |                            |
|-----------------|----------------------------|
| MPC2            |                            |
| Primer pair 1-1 |                            |
| Forward primer  | GGAAGTCATTCCAAAAATGTCCT    |
| Reverse primer  | GGAATTGAAGGGTTCATIONGACT   |
| Primer pair 1-2 |                            |
| Forward primer  | GGAAGTCATTCCAAAAATGTCCTA   |
| Reverse primer  | GGAATTGAAGGGTTCATIONGACTA  |
| Pair 2-1        |                            |
| Forward primer  | GCTGAAGTAACTGAACCAAAAAGAA  |
| Reverse primer  | GGTCTTTATCTCAGTTGGACA      |
| Pair 2-2        |                            |
| Forward primer  | TAGCTGAAGTAACTGAACCAAAAAGA |
| Reverse primer  | TTTGGTCTTTATCTCAGTTGGAC    |
| Primer pair 3-1 |                            |
| Forward primer  | TTAGTTGACTCGGGCGTGAC       |
| Reverse primer  | CCCCTGGAAAACACACTTGG       |
| Primer pair 3-2 |                            |
| Forward primer  | TTTTAGTTGACTCGGGCGTGA      |
| Reverse primer  | ACCTTCAGTACTTGGGGGAAC      |
| Primer pair 4-1 |                            |
| Forward primer  | ACGTGAAACCCTACACCACC       |
| Reverse primer  | TAAACTGTTTTTGC GGCGCT      |
| Primer pair 4-2 |                            |
| Forward primer  | CGTGAAACCCTACACCACCTT      |
| Reverse primer  | TGTAAACTGTTTTTGC GGCGC     |

**Table S2** Continued

| Primers                                       |                        |
|-----------------------------------------------|------------------------|
| Primer pair 5-1                               |                        |
| Forward primer                                | CCGACACCTAAACCCTCTGG   |
| Reverse primer                                | CTTTCCAGCGCGCTTTCC     |
| Primer pair 5-2                               |                        |
| Forward primer                                | AGTCCCTGAGGGTGGTCAAC   |
| Reverse primer                                | CGCTCAGCCGAAGAACCTA    |
| Primers used for the VDAC1 enhancer sequence: |                        |
| Primer pair 1                                 |                        |
| Forward primer                                | TTTGAGAGGCATCTGAGGCT   |
| Reverse primer                                | TGAAGAGAGACTGTGTGGGA   |
| Primer pair 2                                 |                        |
| Forward primer                                | GGCGAAACAGTGGCATTAGA   |
| Reverse primer                                | TCATACCTGCCCCCTGTGAC   |
| Primer pair 3                                 |                        |
| Forward primer                                | GCTGTGGGATAGTGCAACCT   |
| Reverse primer                                | GTACCACTGTGATGCAGCCT   |
| Primer pair 4                                 |                        |
| Forward primer                                | CTCATTGAGTGCATGTGCG    |
| Reverse primer                                | GAGTATTTATTTCCACCTCCTA |
| Primer pair 5                                 |                        |
| Forward primer                                | CGAATGGAATGGTCTTCTGGT  |
| Reverse primer                                | CATTCCTGGAAGGCTTTGCTTT |
| Primer pair 6                                 |                        |
| Forward primer                                | AGGTGCAGGAGATGAGGCTTT  |
| Reverse primer                                | GACTGTACATGGTGTGCTCTG  |

**Table S2** Continued

| Primers        |                         |
|----------------|-------------------------|
| Primer pair 7  |                         |
| Forward primer | GCAGCAATCCCAAGTAGTCCT   |
| Reverse primer | ACCAGTTTGGCAGCTCTCA     |
| Primer pair 8  |                         |
| Forward primer | TCCATGTGAAGAGCTGCCAAA   |
| Reverse primer | ATGGGCCCAACTTTTCACAAAAC |

**Table S3** Sequences of the regulated genes

VDAC1 and HK1 knock-down plasmids were constructed with the vector Y7823 pLKD-CMV-Puro-U6-shRNA (NC, VDAC1, or HK1)

HK1 KD genes:

HK1 NM\_000188 GCCTTTGGAGACGATGGAT

HK1 NM\_000188 CCGAGAATGGTGACTTCTT

HK1 NM\_000188 GCACCTGCGATGACAGTAT

NC TTCTCCGAACGTGTCACGT

VDAC1 KD genes:

VDAC1 NM\_003374 GGATACACTCAGACTCTAA

VDAC1 NM\_003374 GGATGGCAAGAACGTCAAT

VDAC1 NM\_003374 GGACTGGAATTTCAAGCAT

NC TTCTCCGAACGTGTCACGT

MPC1/2 overexpression:

pLenti-EF1a-EGFP-P2A- blasticidin -CMV-MCS

pLenti-EF1a-EGFP-P2A- blasticidin -CMV-MPC1

pLenti-EF1a-EGFP-P2A- blasticidin -CMV-MPC2

pLenti-EF1a-EGFP-P2A- blasticidin -CMV-MPC1-P2A-MPC2

The sequences are as follows:

MPC1 sequence: NM\_016098 CDS

MPC2 sequence: NM\_015415 CDS

OPA1 overexpression:

pLenti-CMV-MCS-3FLAG-PGK-Puro and pLenti-CMV-OPA1-PGK-Puro

The OPA1 sequence was NM\_015560 CDS

**Table S4** Key resource table

| Reagent or resource                                                                      | Source                         | Identifier   |
|------------------------------------------------------------------------------------------|--------------------------------|--------------|
| <b>Chemicals, peptides, and recombinant proteins</b>                                     |                                |              |
| RPMI-1640 medium                                                                         | Gibco                          | C11875500CP  |
| Keratinocyte Serum Free Medium (KSFM)                                                    | Gibco                          | 17005042     |
| Cell Counting Kit-8                                                                      | Dojindo                        | CK04         |
| Fetal bovine serum (FBS)                                                                 | Gibco                          | 10099133     |
| Dimethyl sulfoxide (DMSO)                                                                | Sigma-Aldrich                  | 276855       |
| Methyl jasmonate                                                                         | MERCK                          | 39924-52-2   |
| Presto Blue Reagent                                                                      | Invitrogen                     | A13261       |
| EdU Cell Proliferation Assay Kit                                                         | Ribobio                        | C10310-1     |
| DAPI (4',6-diamidino-2-phenylindole, dihydrochloride)                                    | Invitrogen                     | D1306        |
| Crystal violet staining solution                                                         | Sangon Biotech                 | E607309-0100 |
| Cell Cycle Staining Kit                                                                  | MultiSciences                  | CCS012       |
| Annexin V-FITC/PI apoptosis kit                                                          | Multiscience                   | AP101        |
| UK5099                                                                                   | MCE                            | PF-1005023   |
| Luciferase-based ATP Assay Kit                                                           | Beyotime                       | S0026        |
| <sup>13</sup> C <sub>6</sub> -glucose(D-GLUCOSE(1,2- <sup>13</sup> C <sub>2</sub> ,99%)) | Cambridge Isotope Laboratories | CLM-504-PK   |
| JC-1                                                                                     | Thermo Scientific              | M34152       |
| Calcium Detection Kit                                                                    | Bestbio                        | BB-48112-2   |
| Pierce BCA Protein Assay Kit                                                             | Thermo Scientific              | 23225        |
| TRIzol reagent                                                                           | Invitrogen                     | 15596026     |
| Prime Script RT Reagent Kit                                                              | TaKaRa                         | RR037B       |
| SYBR Green                                                                               | TaKaRa                         | RR820B       |
| Cell Mitochondria Isolation Kit                                                          | Beyotime                       | C3601        |
| CellTiter-Blue Cell Viability Assay                                                      | Promega                        | G8080        |
| Simple ChIP Enzymatic Chromatin IP Kit (Magnetic Beads)                                  | CST                            | 9003         |
| Lipofectamine 3000 Reagent                                                               | Thermo Scientific              | L3000001     |
| 2-Solution DAB Kit                                                                       | Invitrogen                     | 882014       |
| Blasticidin                                                                              | Selleck                        | S7419        |
| Janus Green B                                                                            | Solarbio                       | J8020        |
| <b>Antibodies</b>                                                                        |                                |              |
| Anti-MPC1                                                                                | CST                            | 14462        |
| Anti-MPC2                                                                                | CST                            | 46141        |
| Anti-MPC2                                                                                | Proteintech                    | 20049-1-AP   |
| Anti-MFN1                                                                                | Proteintech                    | 13798-1-AP   |
| Anti-MFN2                                                                                | Proteintech                    | 12186-1-AP   |

Table S4 Continued

| Reagent or resource                       | Source                                                        | Identifier                         |
|-------------------------------------------|---------------------------------------------------------------|------------------------------------|
| Anti-OPA1                                 | Proteintech                                                   | 27733-1-AP                         |
| Anti-DRP1                                 | Proteintech                                                   | 12957-1-AP                         |
| Anti-cytochrome C                         | Proteintech                                                   | 10993-1-AP                         |
| Anti-VDAC1/Porin                          | Proteintech                                                   | 55259-1-AP                         |
| Anti-OMA1                                 | Proteintech                                                   | 17116-1-AP                         |
| YME1L1                                    | Proteintech                                                   | 11510-1-AP                         |
| Glycolysis Antibody Sampler Kit           | CST                                                           | 8337                               |
| Anti-histone H3 (acetyl K27), ChIP grade  | Abcam                                                         | ab4729                             |
| Anti- $\beta$ -Actin (13E5) rabbit mAb    | CST                                                           | 4970S                              |
| Anti- $\beta$ -Tubulin                    | CST                                                           | 2146                               |
| Anti-AR                                   | CST                                                           | 5153                               |
| <b>Experimental Models</b>                |                                                               |                                    |
| Nude mice                                 | Shanghai Laboratory Animal Center, SLAC, China                |                                    |
| NOD-SCID mice                             | Shanghai Laboratory Animal Center, SLAC, China                |                                    |
| <b>Experimental Equipment</b>             |                                                               | <b>Version</b>                     |
| Microplate reader                         | Molecular Devices                                             | Paradigm                           |
| Microplate reader                         | Tecan                                                         | M200PRO                            |
| Nano Zoomer                               | Hamamatsu                                                     | S60                                |
| Microscope                                | Leica                                                         | OMI4000B                           |
| Microscope                                | ZEISS                                                         | Observer. D1                       |
| NanoDrop                                  | Thermo                                                        | 2000c                              |
| Seahorse XF96                             | Agilent                                                       |                                    |
| Irradiation Center                        | Faculty of Naval Medicine, Second Military Medical University |                                    |
| Real-time PCR system                      | Thermo                                                        | QuantStudio 7                      |
| GCMS-QP                                   | Shimadzu                                                      | 2010 Plus quadrupole mass analyzer |
| $^{18}\text{F}$ -FDG micro-PET/CT imaging | Super Nova                                                    |                                    |
| <b>Experimental Software</b>              |                                                               | <b>Version</b>                     |
| Microplate reader software                | Molecular Devices                                             | SoftMax Pro 6.3                    |
| Flow cytometer                            | MACSQuant                                                     | Analyzer 10                        |
| Nano Zoomer                               | Hamamatsu                                                     | NDPscan 3.2                        |
| Avatar (PET-CT) software                  | Pingseng                                                      | 1.2                                |
| SPSS                                      | SPSS Inc.                                                     | 19.0                               |
| GraphPad                                  |                                                               | Prism 5                            |
| Wave                                      | Agilent                                                       | 2.6.0.31                           |

**Table S4** Continued

| Reagent or resource | Source | Identifier |
|---------------------|--------|------------|
| Leica LAS X         | Leica  | LAS X      |
| FlowJo              |        | 7.6        |
| ImageJ              |        | 1.46 r     |

**Table S5** Patient characteristics in metabolic analysis

|             | PCa (discovery set) | PCa         | BPH         |
|-------------|---------------------|-------------|-------------|
| Number      | 25                  | 51          | 19          |
| Age (year)  | 69.0 ± 7.2          | 68.3 ± 7.4  | 65.2 ± 11.8 |
| PSA (ng/mL) | 21.7 ± 21.3         | 23.2 ± 18.7 | 7.7 ± 11.5  |
| GS GS<7     | 2                   | 6           | /           |
| GS=7        | 12                  | 31          | /           |
| GS>7        | 11                  | 14          | /           |

GS, Gleason score.

**Table S6** Patient characteristics in group A and group B

|             | Group A     | Group B      |
|-------------|-------------|--------------|
| Number      | 65          | 125          |
| Age (year)  | 68.8 ± 10.8 | 68.6 ± 6.4   |
| PSA (ng/mL) | 27.8 ± 37.6 | 41.6 ± 110.6 |
| GS          | 7.5 ± 1.0   | 7.7 ± 1.0    |

GS, Gleason score.
